# Supplementary material for: Anti-poisoned oxygen reduction reaction by rice-like Pd–Sb nanoparticles
Source: Royal Society of Chemistry journal article supplement (doi:10.1039/d3ta07146d), 2024-01-01
Supplement: d3ta07146d1.pdf [file d3ta07146d1.pdf]

## *Supporting information for*

### **Anti-poisoned oxygen reduction reaction by rice-like Pd-Sb nanoparticles**

Hui Fu,<sup>a</sup> Yao Chen,<sup>a</sup> Shuanglong Lu,<sup>a</sup> Zhe Zhang,<sup>a</sup> Ting Zhu,<sup>b</sup> Hanjun Li,<sup>a</sup> Feili Lai,<sup>\*c</sup> Nan Zhang<sup>\*a</sup> and Tianxi Liu<sup>\*a</sup>

<sup>a</sup> Key Laboratory of Synthetic and Biological Colloids, Ministry of Education, School of Chemical and Material Engineering, International Joint Research Laboratory for Nano Energy Composites, Jiangnan University, Wuxi, 214122, China.

<sup>b</sup> National Laboratory of Solid-State Microstructures/School of Electronics Science and Engineering/Collaborative Innovation Center of Advanced Microstructures, Nanjing University, Nanjing, 210093, China.

<sup>c</sup> Department of Chemistry, KU Leuven, Celestijnenlaan 200F, Leuven 3001, Belgium.

E-mail: feili.lai@kuleuven.be, nzhang@jiangnan.edu.cn, txliu@jiangnan.edu.cn

#### **Experimental section:**

**Chemicals.** Palladium (II) acetylacetonate (Pd(acac)<sub>2</sub>), polyvinylpyrrolidone (PVP, MW = 58000), oleylamine (OAm, 68-70%), palladium (II) chloride (PdCl<sub>2</sub>), and antimony (III) triacetate (Sb(ac)<sub>3</sub>) were purchased from J&K China Chemical Ltd (Shanghai, China). Antimony (III) trichloride (SbCl<sub>3</sub>) was purchased from Shanghai Aladdin Biochemical Technology Co., Ltd. Ammonium bromide (NH<sub>4</sub>Br), ammonium chloride (NH<sub>4</sub>Cl), ammonium iodide (NH<sub>4</sub>I), N,N-dimethylformamide (DMF), N,N-dimethylacetamide (DMAC), and ethylene glycol (EG) were purchased from Sinopharm Chemical Reagent Co. Ltd (Shanghai, China). Oleic acid (OA, ≥99%) and tri-n-octylphosphine (C<sub>24</sub>H<sub>51</sub>P) were purchased from TCI (Tokyo, Japan). The deionized water (H<sub>2</sub>O) (18 MΩ cm<sup>-1</sup>) used in all experiments was prepared by (or passing water through) an ultra-pure purification system (Aqua Solutions).

**Synthesis of Pd<sub>20</sub>Sb<sub>7</sub> nanoparticles (NPs).** In a typical synthesis of Pd<sub>20</sub>Sb<sub>7</sub> NPs, 7.4 mg of Pd(acac)<sub>2</sub>, 3.9 mg of SbCl<sub>3</sub>, 15 mg of NH<sub>4</sub>Br, 200 mg of PVP, and 10 mL of DMF were added into a 30 mL of glass bottle. The mixture was ultrasonicated for around 0.5 h. The resulting homogeneous mixture was heated from room temperature to 180 °C and kept at 180 °C for 5 h in an oil bath. The resulting colloidal product was collected by centrifugation and washed with an ethanol/acetone mixture.

**Synthesis of Pd NPs.** In a typical synthesis of Pd NPs, 7.4 mg of Pd(acac)<sub>2</sub>, 100  $\mu$ L of C<sub>24</sub>H<sub>51</sub>P, 4 mL of OAm and 1 mL of OA were added into a vial (volume: 30 mL). After the vial had been capped, the mixture was ultrasonicated for around 0.5 h. The resulting homogeneous mixture was heated from room temperature to 160 °C and kept at 160 °C for 5 h in an oil bath. After cooling to room temperature, the colloidal products were collected by centrifugation and washed with a cyclohexane/ethanol mixture.

**Characterization.** Transmission electron microscopy (TEM) images were obtained using HITACHI HT7700 operating at 120 kV. High-resolution TEM (HRTEM) and high-angle annular dark-field scanning transmission electron microscope (HAADF-STEM) images were acquired on a FEI Tecnai F20 transmission electron microscope with an acceleration voltage of 200 kV. Powder X-ray diffraction (PXRD) patterns were collected by a X'Pert-Pro MPD diffractometer (Netherlands PANalytical) with a Cu K $\alpha$  X-ray source ( $\lambda = 1.540598 \text{ \AA}$ ). X-ray photoelectron spectroscopy (XPS) analysis was done with Axis supra (Kratos Analytical Ltd). The carbon peak at 284.8 eV was used as a reference to correct the charging effects. The concentration of catalysts was further determined by the inductively coupled plasma atomic emission spectroscopy (710-ES, Varian, ICP-AES). X-ray absorption fine structure (XAFS) measurements were carried out at the BL14W1 station in Shanghai Synchrotron Radiation Facility (SSRF, 3.5 GeV, 250 mA in maximum, Si (311) double-crystals).

**Electrochemical oxygen reduction reaction (ORR) measurements.** A three-electrode cell was used for the electrochemical measurements. The rotating disk electrode (RDE) from Pine Instruments was used as the working electrode, a saturated calomel electrode (SCE) was used as the reference electrode and a carbon rod was used as the counter electrode, respectively. To prepare the catalyst-coated working electrode, the catalyst was dispersed in a mixture containing isopropanol and Nafion (5 wt%) to form a 0.20 mg<sub>Pd</sub> mL<sup>-1</sup> dispersion. 10  $\mu$ L dispersion of Pd<sub>20</sub>Sb<sub>7</sub> NPs/C (0.20 mg<sub>Pd</sub> mL<sup>-1</sup>) was deposited on a RDE to obtain the working electrode after the solvent was dried at room temperature. The cyclic voltammetry (CV) was carried out at room temperature in 0.1 M KOH solution. The potential scan rate was 50 mV s<sup>-1</sup> for CV measurement. The ORR measurements were conducted in a 0.1 M KOH solution purged with O<sub>2</sub> during the measurement. The scan and rotation rates for ORR measurement were 10 mV s<sup>-1</sup> and 1600 rpm,

respectively. The CH<sub>3</sub>OH and CO tolerance tests were conducted at the same condition with ORR measurements but adding CH<sub>3</sub>OH or CO into electrolyte, respectively. The anti-poisoning durability tests were performed at room temperature in O<sub>2</sub>-saturated 0.1 M KOH by introducing 0.5 M CH<sub>3</sub>OH or CO into the electrolyte at 200 s. All electrochemical experiments were performed at room temperature. For comparison, the as prepared Pd NPs/C and the commercial Pd/C were used as the baseline catalysts, and same procedures described above were applied to conduct the electrochemical measurements.

**Gas diffusion electrode (GDE) measurements.** The catalysts were dispersed in a mixture containing isopropanol and deionized water (v: v=1: 3) and Nafion (5 wt%) to form a 0.50 mg<sub>Pd</sub> mL<sup>-1</sup> dispersion. 10 μL of catalyst dispersion was deposited on the gas diffusion layer to form catalyst layer. The catalyst layer (0.2 cm<sup>2</sup>), carbon rod, and SCE were used as the working electrode, counter electrode, and reference electrode, respectively. Before the ORR measurements, 50 CV cycles were applied at a scanning rate of 500 mV s<sup>-1</sup> in 1 M KOH to activate the catalysts. Then, the ORR polarization curves were measured in the potential range from 0.06 V<sub>RHE</sub> to 1.1 V<sub>RHE</sub> with the sweep rate of 50 mV s<sup>-1</sup> under conditions of slow O<sub>2</sub> flow rate. Using this setup, the humid gas was introduced into the GDE cell at room temperature.

**Density functional theory (DFT) calculations.** Geometric optimizations using periodic DFT were performed in the Vienna *ab initio* simulation package (VASP) within the plane wave method and generalized gradient approximation Perdew-Burke-Ernzerhof (GGA-PBE) functional.<sup>1-3</sup> Calculations were converged until energy and force components were less than 3 × 10<sup>-5</sup> eV and 0.05 eV/Å, respectively. A 500-eV plane wave cutoff was applied for all calculations. The centered K points sampling in reciprocal space with 5 × 1 × 1 mesh were used. The vacuum space was set as 10 Å in z coordinate to avoid the image interaction between periodic slabs. The Pd-terminal facet with the minimal dangling bond was chosen to be the surface model, as it closely relates to experiment. All the slabs were constructed with three layers of Pd-Sb-Pd composites, of which only the top one layer was allowed to relax.

## References:

1. G. Kresse and J. Furthmüller, *Comput. Mater. Sci.* 1996, **6**, 15-50.
2. P. E. Blöchl, *Phys. Rev. B* 1994, **50**, 17953-17979.
3. J. P. Perdew, K. Burke and M. Ernzerhof, *Phys. Rev. Lett.* 1996, **77**, 3865-3868.

## Supporting Figures and Table.

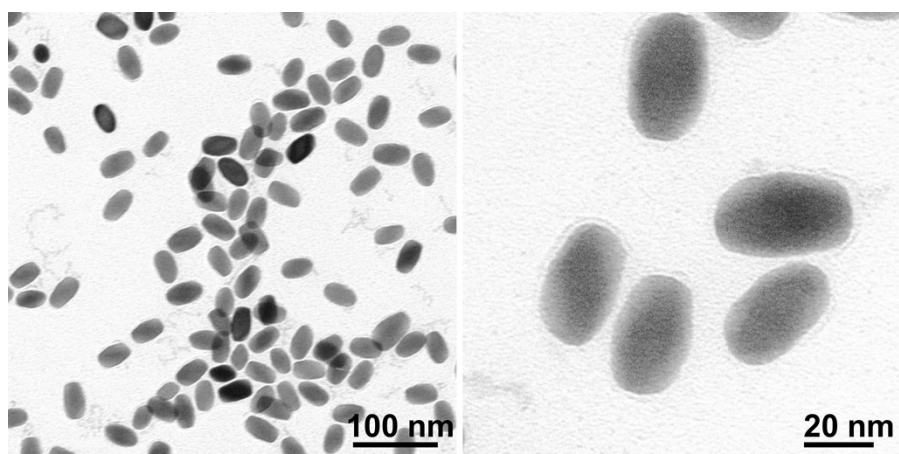

**Fig. S1.** TEM images of Pd<sub>20</sub>Sb<sub>7</sub> NPs.

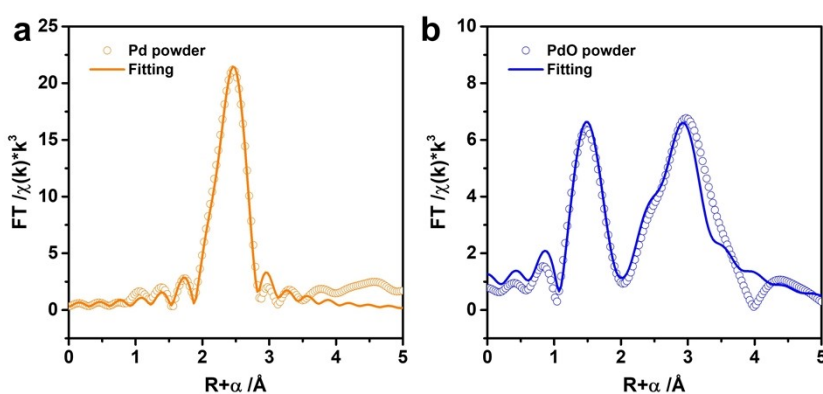

**Fig. S2.** Experimental and fitting data of Pd K-edge FT-EXAFS spectrum in R space for (a) Pd powder and (b) PdO powder.

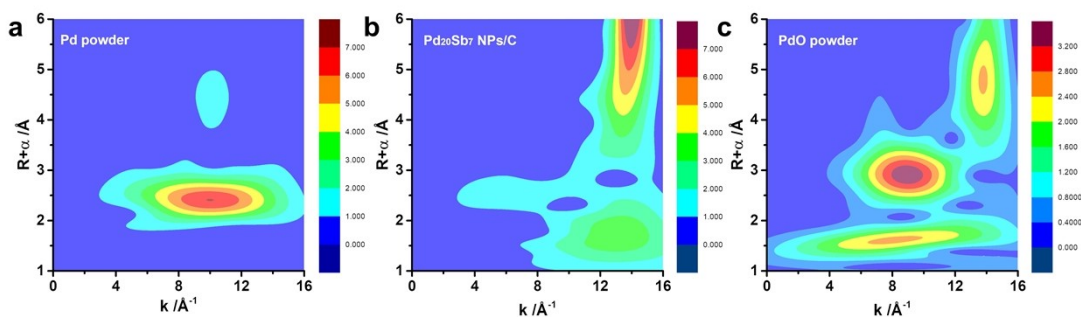

**Fig. S3.** WT analyses of the Pd K-edge FT-EXAFS data for (a) Pd powder, (b) Pd<sub>20</sub>Sb<sub>7</sub> NPs/C, and (c) PdO powder.

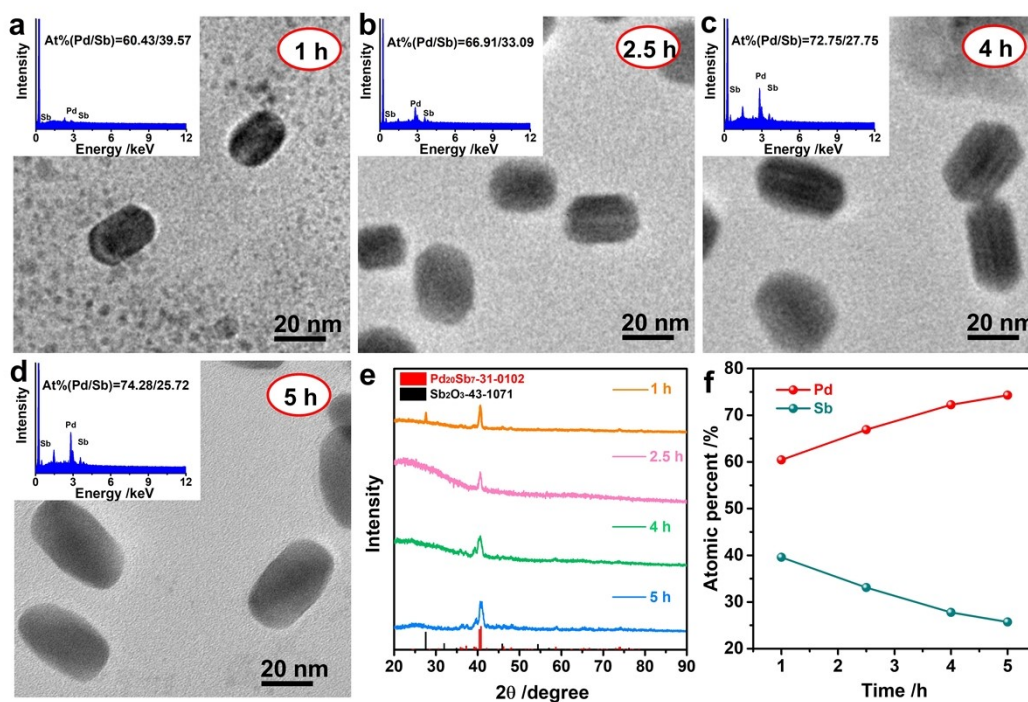

**Fig. S4.** TEM images of Pd-Sb NPs at different reaction times: (a) 1 h, (b) 2.5 h, (c) 4 h, (d) 5 h. (The insert images are SEM-EDS spectra at the corresponding times) (e) PXRD patterns and (f) SEM-EDS results of the intermediates produced at different reaction times.

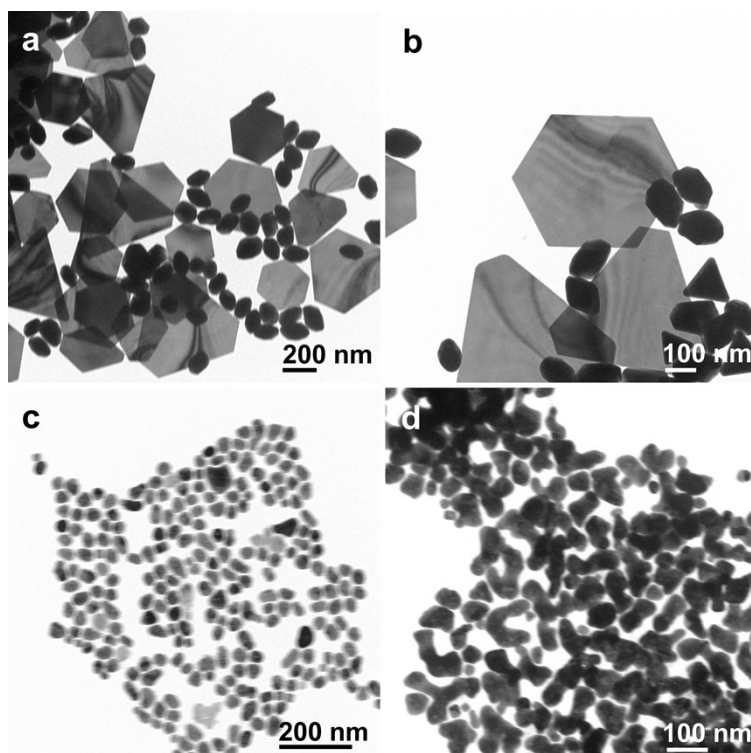

**Fig. S5.** TEM images of the products with the same reaction conditions as those of the Pd<sub>20</sub>Sb<sub>7</sub> NPs except the use of (a)-(b) NH<sub>4</sub>Cl and (c)-(d) NH<sub>4</sub>I to take place of NH<sub>4</sub>Br.

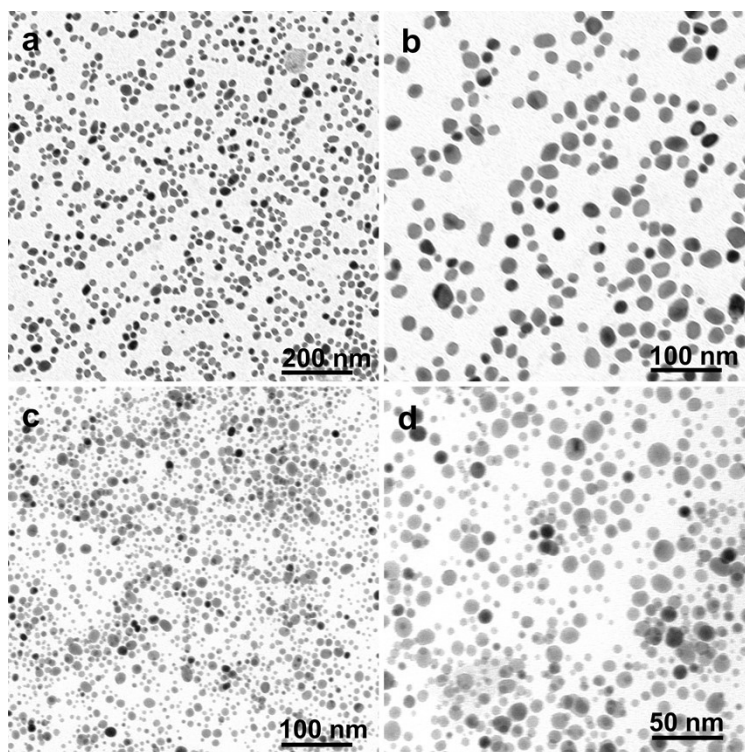

**Fig. S6.** TEM images of the products with the same reaction conditions as those of the Pd<sub>20</sub>Sb<sub>7</sub> NPs except the use of (a)-(b) DMAC and (c)-(d) EG to take place of DMF.

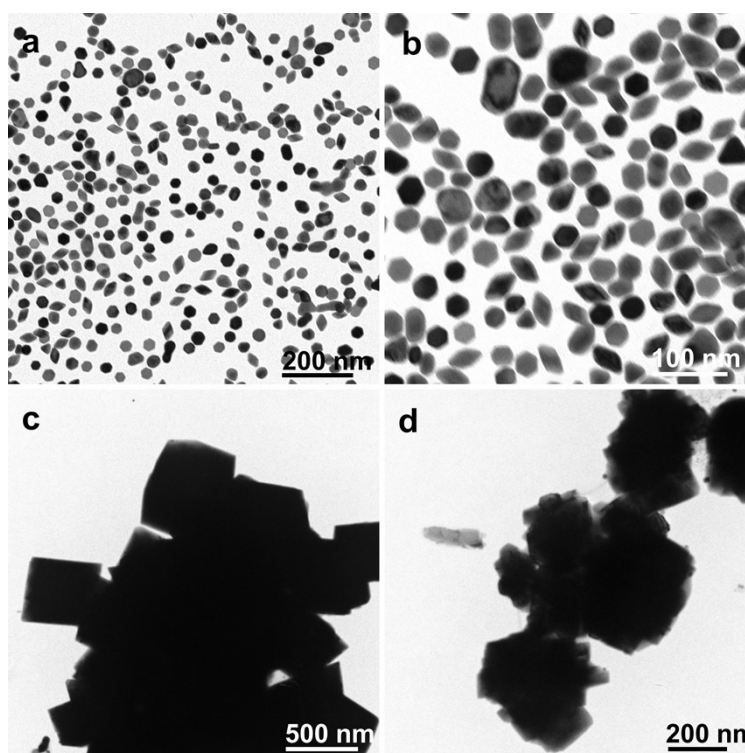

**Fig. S7.** TEM images of the products with the same reaction conditions as those of the Pd<sub>20</sub>Sb<sub>7</sub> NPs except the use of (a)-(b) PdCl<sub>2</sub> to take place of Pd(acac)<sub>2</sub> and (c)-(d) Sb(ac)<sub>3</sub> to take place of SbCl<sub>3</sub>.

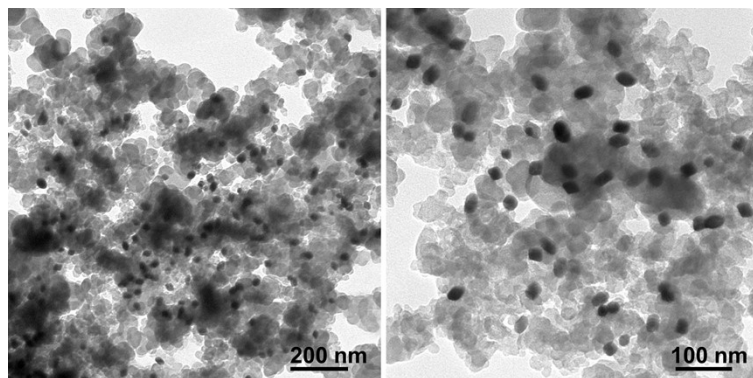

**Fig. S8.** TEM images of Pd<sub>20</sub>Sb<sub>7</sub> NPs/C.

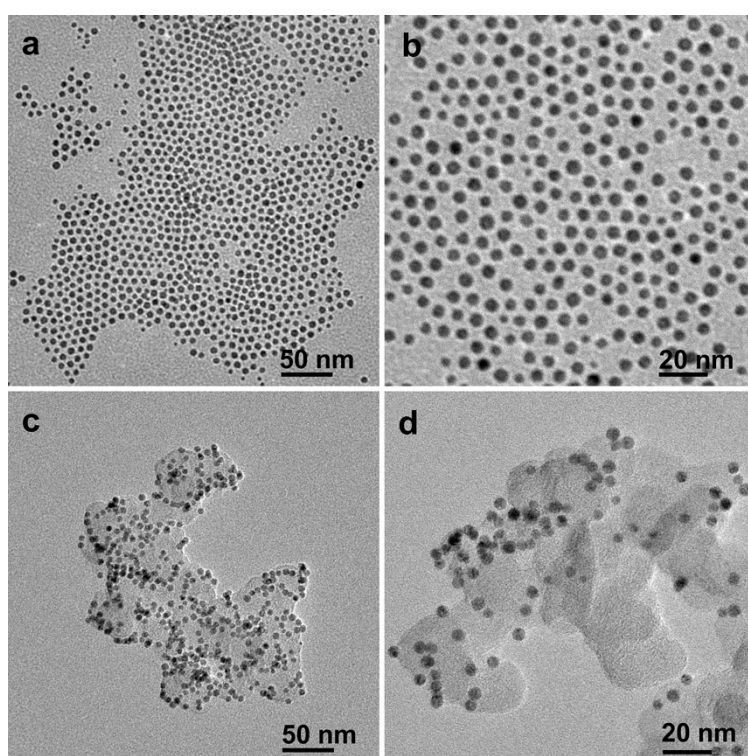

**Fig. S9.** TEM images of (a)-(b) Pd NPs and (c)-(d) Pd NPs/C.



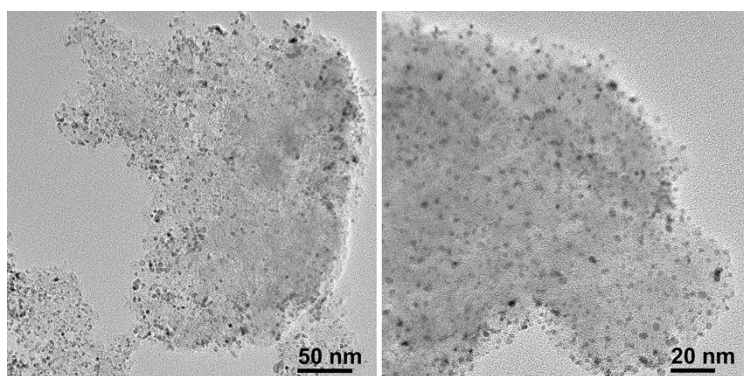

**Fig. S10.** TEM images of the commercial Pd/C.

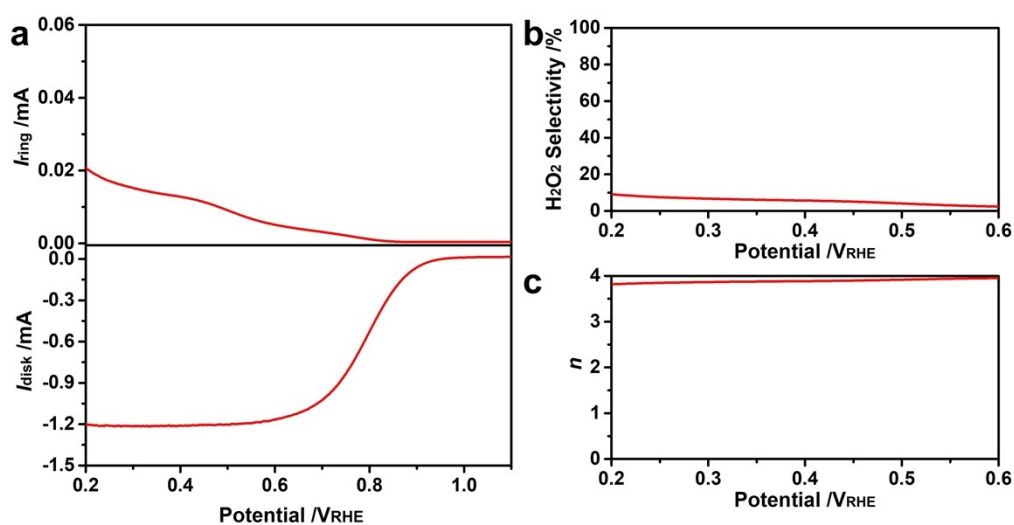

**Fig. S11.** (a) RRDE voltammograms of Pd<sub>20</sub>Sb<sub>7</sub> NPs/C at 1600 rpm in O<sub>2</sub>-saturated 0.1 M KOH with the disk current density and ring current. The scan rate is 10 mV s<sup>-1</sup>. (b) H<sub>2</sub>O<sub>2</sub> selectivity as a function of the applied potential. (c) The calculated values of n as a function of the applied potential.

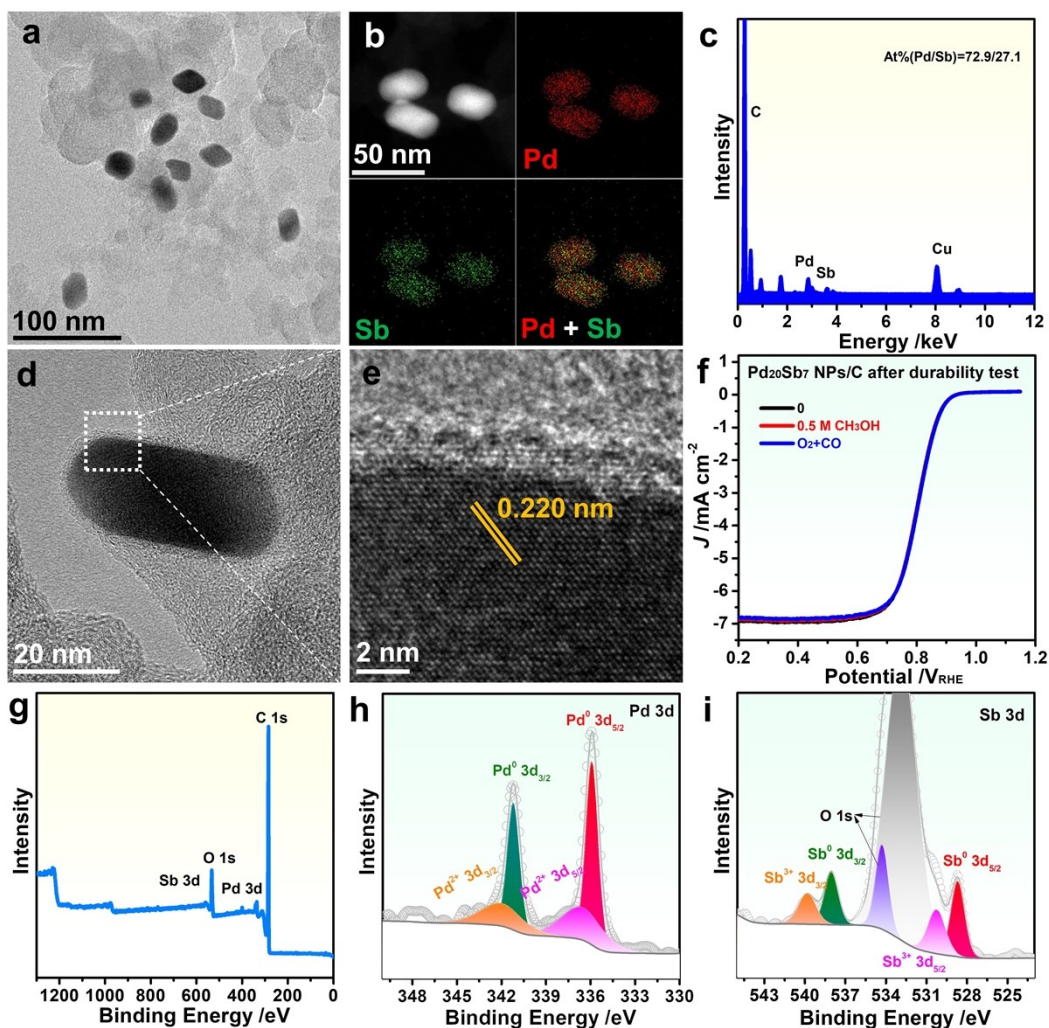

**Fig. S12.** (a) TEM image, (b) HAADF-STEM image and corresponding element mappings, (c) TEM-EDX spectrum, (d-e) HRTEM images, (f) ORR polarization curves in 0.1 M KOH with 0.5 M CH<sub>3</sub>OH or CO, and XPS spectra of (g) survey, (h) Pd 3d, and (i) Sb 3d of Pd<sub>20</sub>Sb<sub>7</sub> NPs/C after durability test.

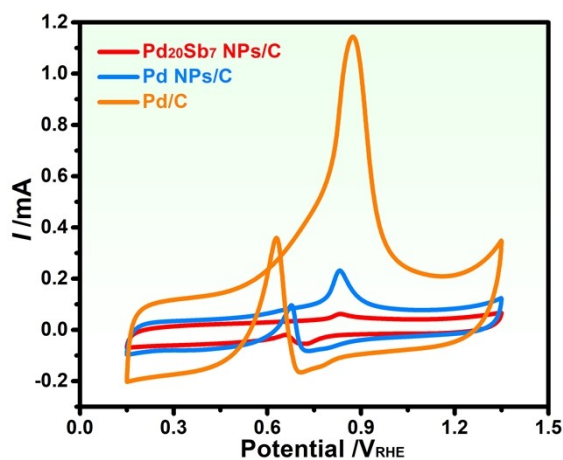

**Fig. S13.** CVs of Pd<sub>20</sub>Sb<sub>7</sub> NPs/C, Pd NPs/C, and the commercial Pd/C in 0.1 M KOH and 0.5 M CH<sub>3</sub>OH solution.

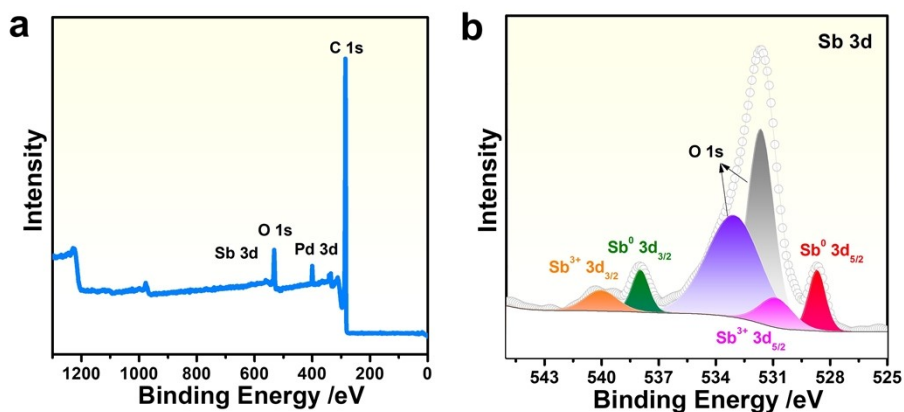

**Fig. S14.** XPS spectra of (a) survey and (b) Sb 3d of Pd<sub>20</sub>Sb<sub>7</sub> NPs/C.

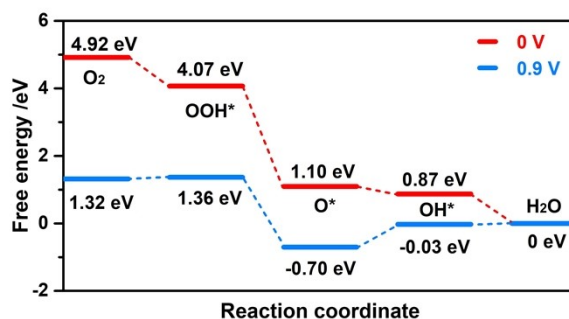

**Fig. S15.** Calculated free energy profiles at 0 and 0.9 V for ORR on Pd {111} facet, respectively.

**Table S1.** Curve fit parameters of Pd K-edge EXAFS for Pd powder, Pd<sub>20</sub>Sb<sub>7</sub> NPs/C, and PdO powder.

| Sample                                 | Path  | CN <sup>a</sup> | R / Å <sup>b</sup> | σ <sup>2</sup> / Å <sup>2c</sup> | ΔE / eV    | R-factor |
|----------------------------------------|-------|-----------------|--------------------|----------------------------------|------------|----------|
| Pd powder                              | Pd-Pd | 12              | 2.74±0.003         | 0.005±0.001                      | -3.42±0.64 | 0.011    |
| Pd <sub>20</sub> Sb <sub>7</sub> NPs/C | Pd-Sb | 3               | 2.73±0.031         | 0.009±0.005                      | 2.00±2.38  | 0.042    |
| PdO powder                             | Pd-O  | 4               | 2.04±0.016         | 0.003±0.003                      | 3.40±2.17  | 0.046    |
|                                        | Pd-Pd | 4               | 3.09±0.002         | 0.002±0.002                      |            |          |

<sup>a</sup>: CN is the coordination number.

<sup>b</sup>: R is the interatomic distance (the bond length between central atoms and surrounding atoms).

<sup>c</sup>: σ<sup>2</sup> is the Debye-Waller factor (a measure of thermal and static in absorber-scatter distances).
